# Supplementary material for: Molecular Survey of Babesia and Anaplasma Infection in Cattle in Bolivia
Source: MDPI journal article supplement (doi:10.3390/vetsci8090188), 2021-09-07
Supplement: s1 [file s1]

## Supplementary Data

**Table S1. Results of PCR and Sanger sequencing of *Anaplasmataceae*-positive samples.**

| Cattle ID | EHR PCR | <i>gltA</i> PCR (primer set 1) | <i>gltA</i> PCR (primer set 2) | <i>groEL</i> PCR (primer set 1) | <i>groEL</i> PCR (primer set 2) | <i>groEL</i> PCR (primer set 3) |
|-----------|---------|--------------------------------|--------------------------------|---------------------------------|---------------------------------|---------------------------------|
| U1-H5     | +       | -                              | M                              | <i>A. platys</i> -like          | M                               | -                               |
| U1-H517   | +       | M                              | <i>A. platys</i> -like         | <i>A. platys</i> -like          | <i>A. platys</i> -like          | M                               |
| U1-H520   | +       | <i>A. platys</i> -like         | -                              | <i>A. platys</i> -like          | M                               | M                               |
| U1-H527   | +       | M                              | M                              | <i>A. platys</i> -like          | M                               | M                               |
| U1-H530   | +       | <i>A. platys</i> -like         | <i>A. platys</i> -like         | <i>A. platys</i> -like          | <i>A. platys</i> -like          | <i>A. platys</i> -like          |
| U1-H536   | +       | M                              | M                              | <i>A. platys</i> -like          | -                               | <i>A. platys</i> -like          |
| U1-H1210  | +       | <i>A. platys</i> -like         | M                              | <i>A. platys</i> -like          | -                               | <i>A. platys</i> -like          |
| U1-H1212  | +       | <i>A. platys</i> -like         | M                              | <i>A. platys</i> -like          | -                               | <i>A. platys</i> -like          |
| P2-N275   | +       | -                              | -                              | M                               | M                               | M                               |
| P3-N8     | +       | M                              | M                              | M                               | M                               | M                               |
| U2-G332   | +       | M                              | -                              | <i>A. platys</i> -like          | M                               | <i>A. platys</i> -like          |
| U2-G347   | +       | M                              | M                              | <i>A. platys</i> -like          | M                               | M                               |
| U2-G376   | +       | M                              | M                              | <i>A. platys</i> -like          | M                               | M                               |
| U2-G431   | +       | <i>A. platys</i> -like         | <i>A. platys</i> -like         | <i>A. platys</i> -like          | <i>A. platys</i> -like          | <i>A. platys</i> -like          |
| U2-G516   | +       | <i>A. platys</i> -like         | <i>A. platys</i> -like         | <i>A. platys</i> -like          | <i>A. platys</i> -like          | M                               |
| U2-G521   | +       | <i>A. platys</i> -like         | <i>A. platys</i> -like         | <i>A. platys</i> -like          | M                               | M                               |
| U2-G1114  | +       | M                              | M                              | <i>A. platys</i> -like          | M                               | <i>A. platys</i> -like          |
| U2-G1154  | +       | M                              | -                              | <i>A. platys</i> -like          | M                               | M                               |

|          |   |                        |                        |                        |   |   |
|----------|---|------------------------|------------------------|------------------------|---|---|
| U2-G1170 | + | M                      | -                      | <i>A. platys</i> -like | M | M |
| U2-G2136 | + | M                      | -                      | <i>A. platys</i> -like | M | M |
| U2-G3862 | + | M                      | -                      | <i>A. platys</i> -like | M | M |
| U2-G4172 | + | M                      | M                      | M                      | M | - |
| U2-G5250 | + | <i>A. marginale</i>    | M                      | M                      | M | - |
| U2-N1068 | + | M                      | M                      | <i>A. platys</i> -like | - | M |
| U2-N1108 | + | M                      | -                      | M                      | - | M |
| U3-C5102 | + | M                      | <i>A. platys</i> -like | <i>A. platys</i> -like | - | - |
| U3-C2086 | + | <i>A. platys</i> -like | <i>A. platys</i> -like | <i>A. platys</i> -like | - | - |
| U3-C1220 | + | <i>A. platys</i> -like | <i>A. platys</i> -like | M                      | - | M |
| U3-C5016 | + | <i>A. platys</i> -like | <i>A. platys</i> -like | M                      | - | M |
| U3-C9210 | + | M                      | M                      | M                      | - | M |
| U3-C4078 | + | <i>A. platys</i> -like | <i>A. platys</i> -like | M                      | M | M |
| U3-C4250 | + | -                      | M                      | M                      | M | M |

---

*gltA* PCR primer set 1, PglT-F, PglT-R1, and PglT-R2. *gltA* PCR primer set 2, PglT-L-F1, PglT-L-F2, and PglT-L-R. *groEL* PCR primer set 1, Pgro-F1, Pgro-F2, and Pgro-R. *groEL* PCR primer set 2, Pgro-F-F, Pgro-F-R1, and Pgro-F-R2. *groEL* PCR primer set 3, Pgro-L-F1, Pgro-L-F2, and Pgro-L-R.

+, PCR positive; -, PCR negative; M, mixed signals in Sanger sequencing data.

**Table S2. List of samples co-infected with *Babesia* and *Anaplasma*.**

| <b>Cattle ID</b> | <b>Farm</b>       | <b><i>Babesia</i> species</b> | <b><i>Anaplasma</i> species</b> |
|------------------|-------------------|-------------------------------|---------------------------------|
| U1-H5            | University Farm 1 | <i>B. bigemina</i>            | <i>A. platys</i> -like          |
| U1-H517          | University Farm 1 | <i>B. bigemina</i>            | <i>A. platys</i> -like          |
| U1-H536          | University Farm 1 | <i>B. bigemina</i>            | <i>A. platys</i> -like          |
| U1-H1210         | University Farm 1 | <i>B. bigemina</i>            | <i>A. platys</i> -like          |
| U1-H1212         | University Farm 1 | <i>B. bigemina</i>            | <i>A. platys</i> -like          |
| U2-G5250         | University Farm 2 | <i>B. bigemina</i>            | <i>A. marginale</i>             |
| U2-N1068         | University Farm 2 | <i>B. bigemina</i>            | <i>A. platys</i> -like          |
| U2-N1108         | University Farm 2 | <i>B. bigemina</i>            | <i>A. platys</i> -like          |

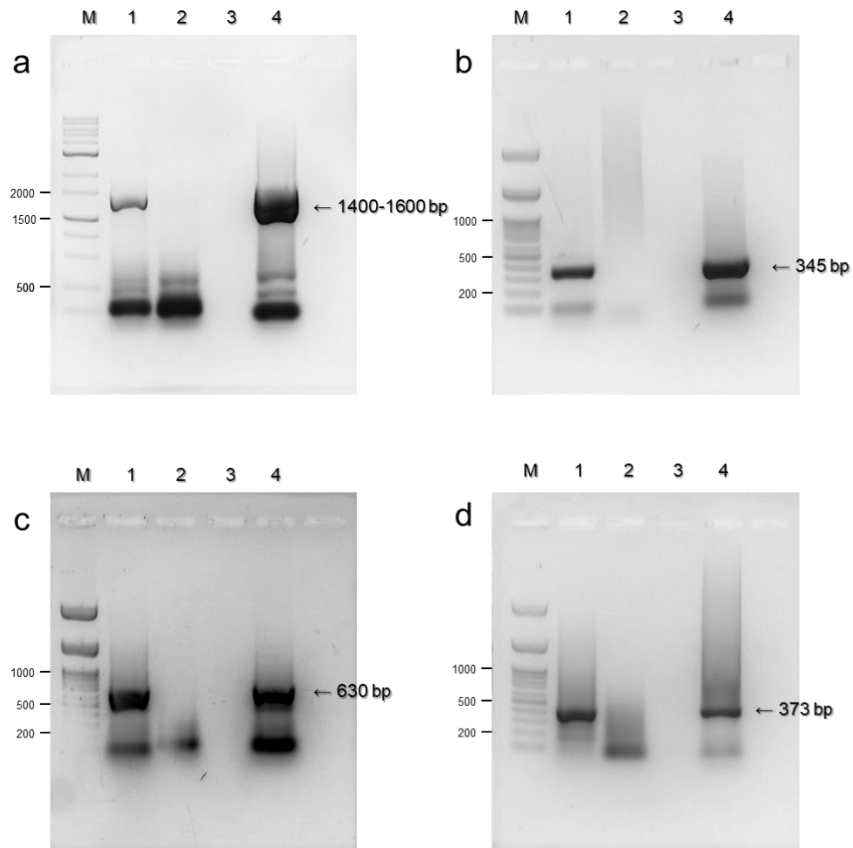

**Figure S1. Agarose gel electrophoresis of (a) BTH PCR products, (b) EHR PCR products, (c) *gltA* PCR (primer set 1) products, and (d) *groEL* PCR (primer set 1) products.** The expected amplified product size is shown with an arrow. Lanes M, 1, 2, 3, and 4 indicate DNA size marker, PCR-positive sample, PCR-negative sample, negative control (water), and positive control (*Babesia* or *Anaplasma* DNA), respectively.
